# Supplementary material
Source: PubMed Central journal article supplement (PMC6882500)
Supplement: NIHMS1059371-supplement-2.pdf [file NIHMS1059371-supplement-2.pdf]

## Supplementary Materials for

### **TFEB drives PGC-1 $\alpha$ expression in adipocytes to protect against diet-induced metabolic dysfunction**

Trent D. Evans, Xiangyu Zhang, Se-Jin Jeong, Anyuan He, Eric Song, Somashubhra Bhattacharya, Karyn B. Holloway, Irfan J. Lodhi, Babak Razani\*

\*Corresponding author. Email: [brazani@im.wustl.edu](mailto:brazani@im.wustl.edu)

Published 5 November 2019, *Sci. Signal.* **12**, eaau2281 (2019)  
DOI: 10.1126/scisignal.aau2281

#### **This PDF file includes:**

- Fig. S1. WD-induced obesity in male mice.
- Fig. S2. Metabolic phenotyping of Adipo-TFEB mice.
- Fig. S3. Analyses of the autophagy-lysosome system and mitophagy in Adipo-TFEB mice.
- Fig. S4. iWAT stromal vascular adipocyte culture model.
- Fig. S5. UCP-1 expression and transcriptional responses in cold and thermoneutrality.
- Fig. S6. Transcriptional response of PGC-1 $\alpha$  and PPAR $\alpha$  to TFEB overexpression.
- Fig. S7. Additional analyses in mice with concurrent PGC-1 $\alpha$  deficiency.
- Table S1. PCR primers used in the present study.

## SUPPLEMENTAL FIGURES

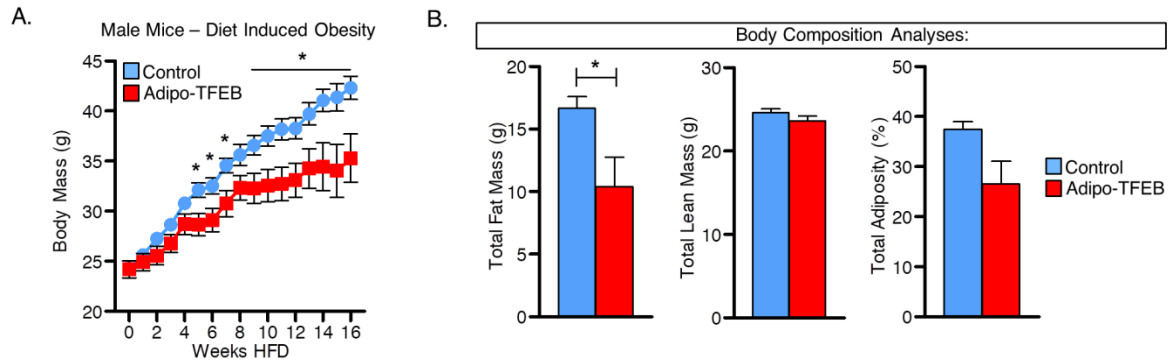

**Fig. S1. WD-induced obesity in male mice. A.** Body mass of male mice fed a Western diet for 16 weeks (n=16 control mice, 8 Adipo-TFEB mice). **B.** Total fat mass, lean mass and total adiposity in Western diet-fed male mice (n=16 control mice, 8 Adipo-TFEB mice). Data presented as mean  $\pm$ SEM. \*Student's two-tailed t-test  $P < 0.05$ .

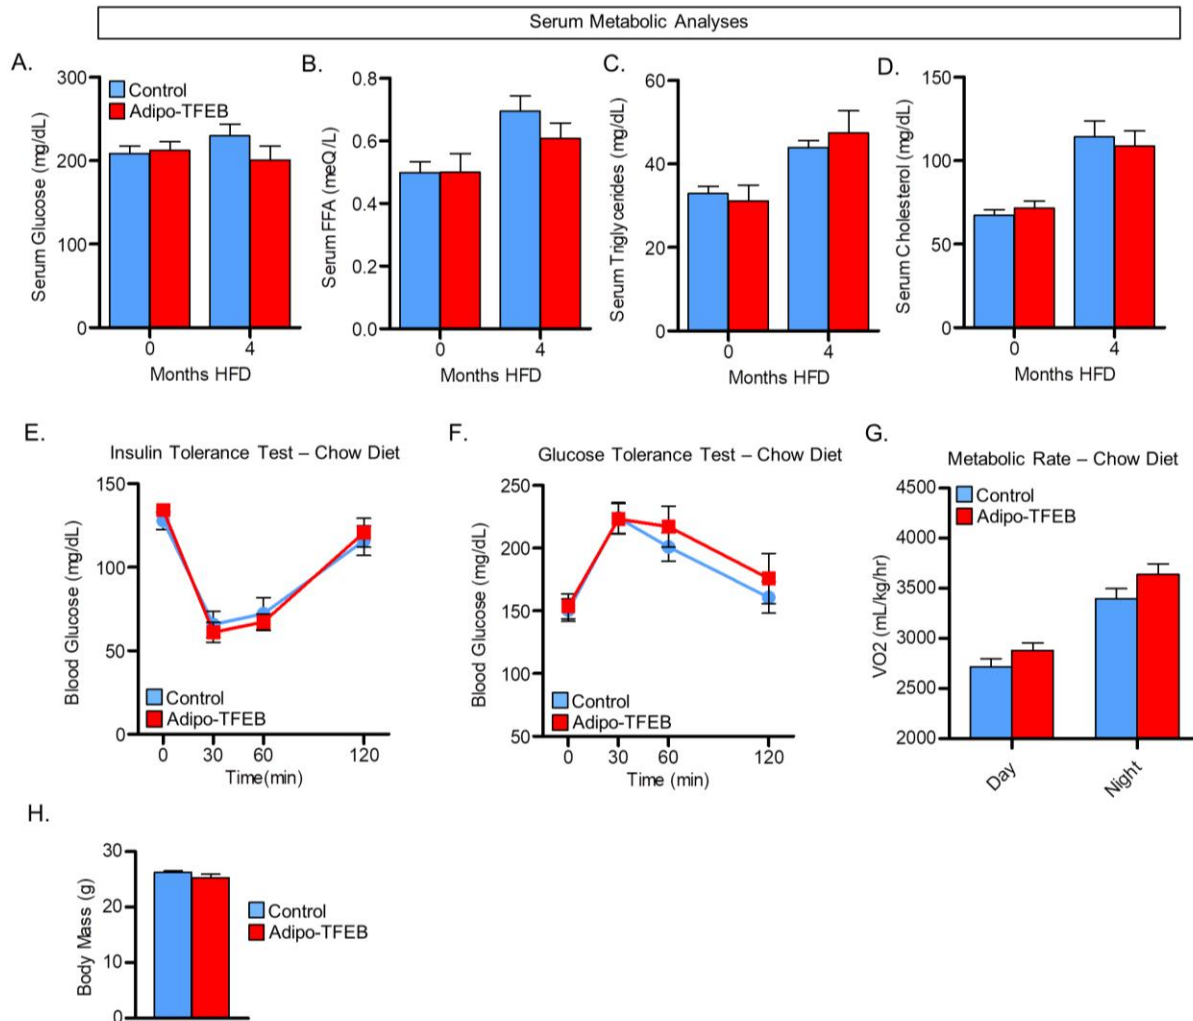

**Fig. S2. Metabolic phenotyping of Adipo-TFEB mice.** Fasting serum levels of **A.** Glucose **B.** Free Fatty Acids **C.** Triglycerides **D.** Cholesterol in female mice immediately prior to the initiation of or following 4 months Western Diet (n=11-21 mice per group). **E.** Insulin tolerance test in chow-fed 8 week old male mice (n= 8 Control, 6 Adipo-TFEB mice). **F.** Glucose tolerance test in chow-fed 9 week old male mice (n=8 Control, 6 Adipo-TFEB mice). **G.** Metabolic Rate (VO<sub>2</sub>) measured over given 12h intervals in 10 week old chow-fed male mice (n=7 Control, 5 Adipo-TFEB mice). **H.** Body mass in mice from (G) (n=7 Control, 5 Adipo-TFEB mice). Data presented as mean ±SEM. \*Student's two-tailed t-test P < 0.05.

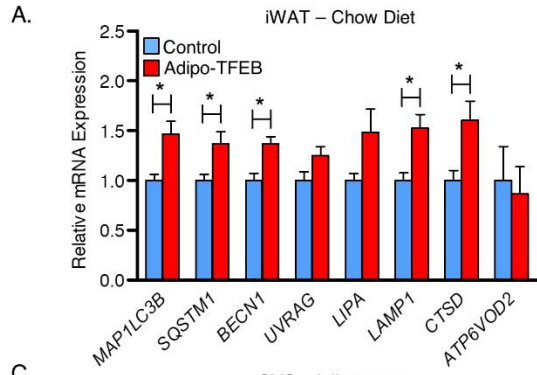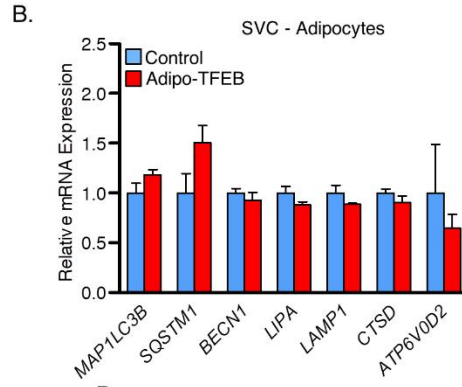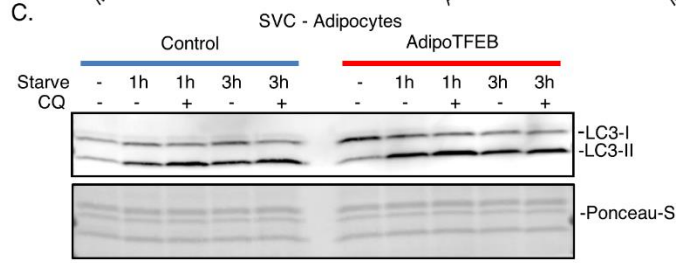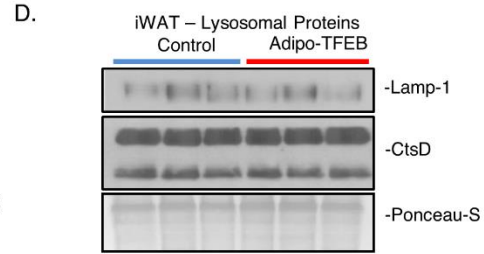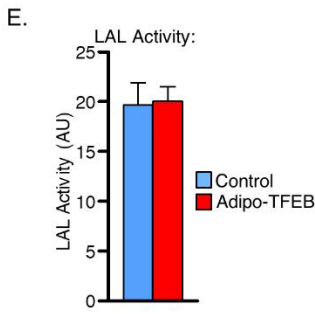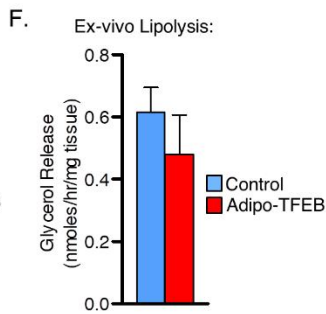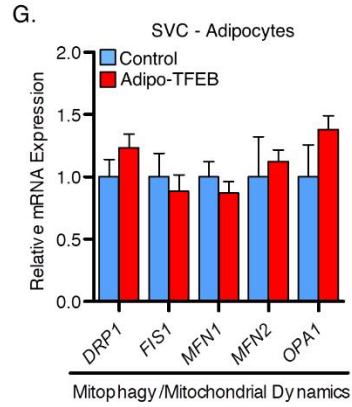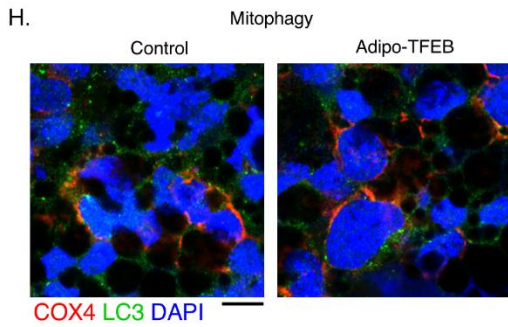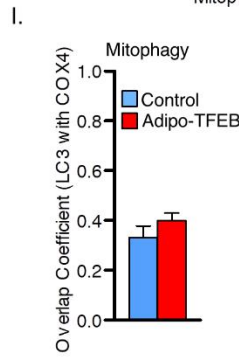

**Fig. S3. Analyses of the autophagy-lysosome system and mitophagy in Adipo-TFEB mice.**

All analyses were performed in tissues from 8 week old chow fed female mice. **A.**

Transcriptional characterization of TFEB-target autophagy-lysosome genes in iWAT (n=8

Control, 8 Adipo-TFEB mice). **B.** Autophagy-lysosome genes in stromal-vascular adipocytes

from iWAT (n=3 biological replicates/group). **C.** Autophagic flux analysis in stromal vascular

adipocytes that were starved and treated with chloroquine (50  $\mu$ M) as indicated. Results are

representative of two independent experiments. **D.** Protein expression of lysosome markers in

iWAT (n=3 8-week old female mice for each genotype). **E.** Lysosomal acid lipase activity in

iWAT (n=3 8-week old female mice for each genotype). **F.** Lipolysis as assessed by glycerol

release from WAT explants (n=3 control, 4 Adipo-TFEB mice). **G.** Gene expression of

mitophagy and mitochondrial dynamics genes in SVC-Adipocytes (n=3 biological

replicates/group and representative of at least 2 independent experiments). **H.**

Immunofluorescent colocalization analyses assessing recruitment of autophagosomes (LC3) to

mitochondria (COX4). Scale bar length - 10 $\mu$ M. **I.** Overlap coefficient of LC3 with COX4 (n>35

cells/group from >10 different fields. Data presented as mean  $\pm$ SEM. \*Student's two-tailed t-test

P < 0.05.

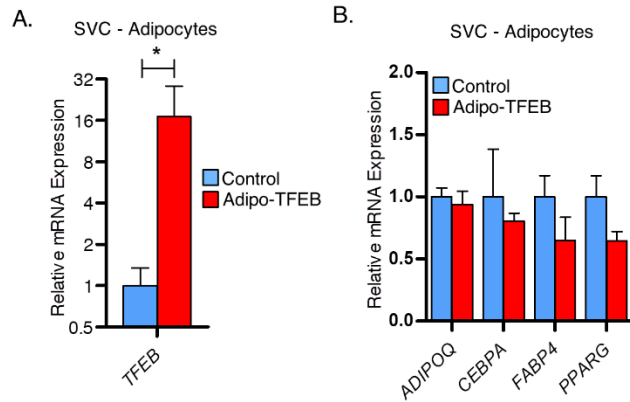

**Fig. S4. iWAT stromal vascular adipocyte culture model.** **A.** Demonstration of TFEB overexpression and **B.** similar adipogenic efficiency in cultured, differentiated SVC adipocytes. n=3 biological replicates/group and representative of at least 2 independent experiments. Data presented as mean  $\pm$ SEM. \*Student's two-tailed t-test  $P < 0.05$ .

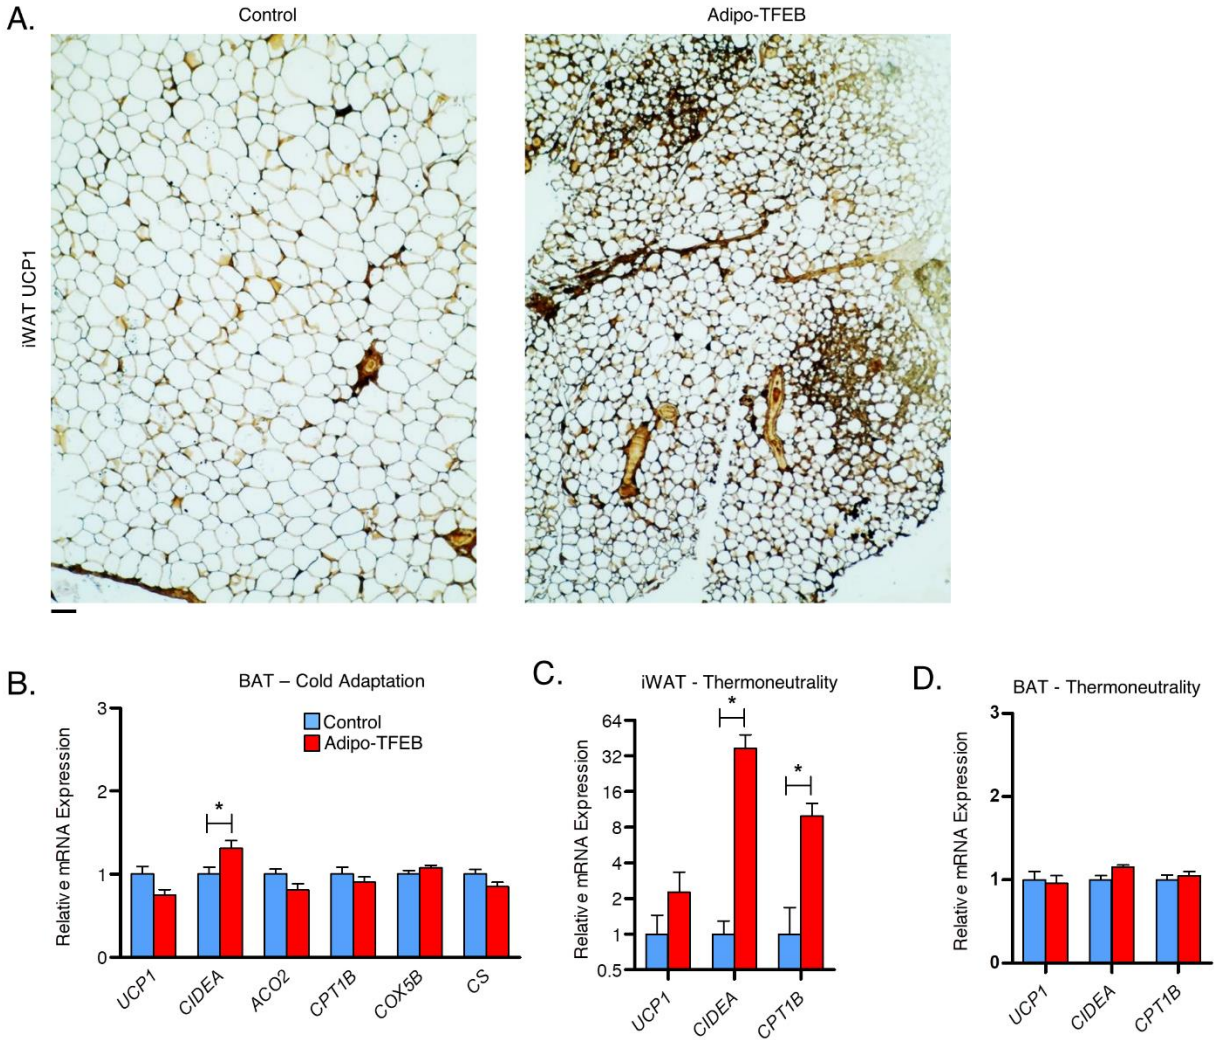

**Fig. S5. UCP-1 expression and transcriptional responses in cold and thermoneutrality. A.** Uncropped images of UCP1 immunohistochemistry in iWAT presented in Fig. 4. **B.** Mitochondrial and lipid oxidation gene expression in BAT of 3-month old male mice (n=8 Control, 6 Adipo-TFEB mice) following 48h group housing at 4°C. **C.** iWAT and **D.** BAT gene expression in 10 week old male mice housed at thermoneutrality (30°C) for 2 weeks (n=4 Control, 3 Adipo-TFEB mice). Data presented as mean  $\pm$ SEM. \*Student's two-tailed t-test  $P < 0.05$ .

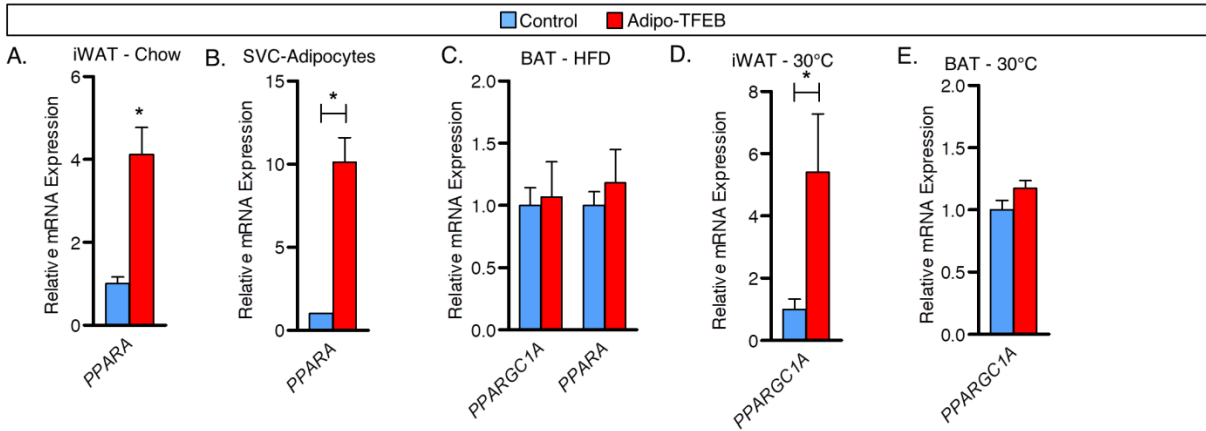

**Fig. S6. Transcriptional response of PGC-1 $\alpha$  and PPAR $\alpha$  to TFEB overexpression.**

**A.** PPAR $\alpha$  mRNA in inguinal adipose from 8 week old female chow-fed mice (n=9 Control, 7 Adipo-TFEB mice). **B.** Stromal vascular adipocytes (n=3 biological replicates/group and representative of two independent experiments). **C.** Interscapular brown adipose tissue from female mice fed a Western diet for 4 months (n=9 Control, 7 Adipo-TFEB mice). **D.** iWAT and **E.** BAT PPARGC1 $\alpha$  expression in 10-week old mice housed at thermoneutrality (30°C) for 2 weeks (n=4 Control, 3 Adipo-TFEB mice). Data presented as mean  $\pm$ SEM. \*Student's two-tailed t-test  $P < 0.05$ .



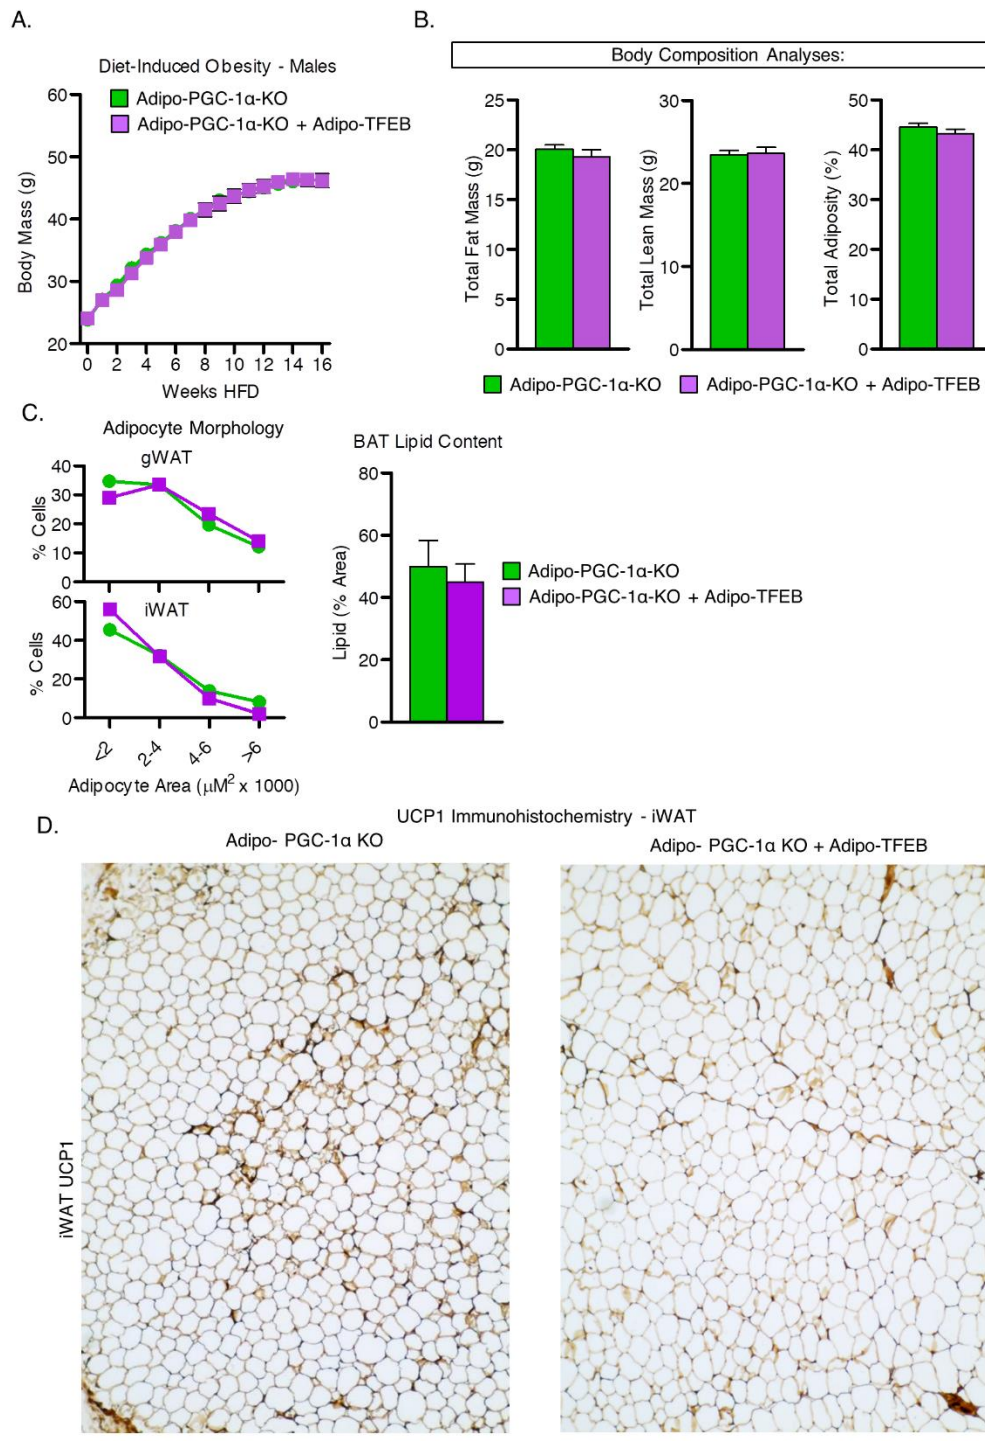

**Fig. S7. Additional analyses in mice with concurrent PGC-1 $\alpha$  deficiency.**

**A.** Body mass of male mice fed a Western diet for 16 weeks (n=15 Adipo-PGC-1 $\alpha$ -KO, 12 Adipo-PGC-1 $\alpha$ -KO + Adipo-TFEB mice) **B.** Total fat mass, lean mass and total adiposity in Western diet-fed male mice (n=10 Adipo-PGC-1 $\alpha$ -KO, 8 Adipo-PGC-1 $\alpha$ -KO + Adipo-TFEB mice). **C.** gWAT and iWAT adipocyte sizing and BAT lipid content in Western diet-fed female (pooled from n=6 mice/group). **D.** Uncropped UCP1 immunohistochemistry images from Fig. 8.

**Table S1. PCR primers used in the present study.**

| qPCR Primers        | Forward                                               | Reverse                                       |
|---------------------|-------------------------------------------------------|-----------------------------------------------|
| PPARGC1A            | 5'- AGC CGT GAC CAC TGA CAA CGA G -3'                 | 5'- GCT GCA TGG TTC TGA GTG CTA AG -3'        |
| CS                  | 5'- CAA GCA GCA ACA TGG GAA GA -3'                    | 5'- GTC AGG ATC AAG AAC CGA AGT CT -3'        |
| PPARD               | 5'- GGT CAT AGC TCT GCC ACC AT -3'                    | 5'- ACT CAG AGG CTC CTG CTC AC -3'            |
| PPARG               | 5'- TCA GAG GGA CAA GGA TTC ATG A -3'                 | 5'- CAC CAA AGG GCT TCC GCA GGC T -3'         |
| UCP1                | 5'- GTG AAG GTC AGA ATG CAA GC -3'                    | 5'- AGG GCC CCC TTC ATG AGG TC -3'            |
| ACO2                | 5'- GTT GGA CCC ACC CAA AGA T -3'                     | 5'- GGT CCG TGG TAT TCC ACA ATA G -3'         |
| CPT1B               | 5'- TGT CTA CCT CCG AAG CAG GA -3'                    | 5'- GCT GCT TGC ACA TTT GTG TT -3'            |
| PPARA               | 5'- AGT TCG GGA ACA AGA CGT TG -3'                    | 5'- CAG TGG GGA GAG AGG ACA GA -3'            |
| DIO2                | 5'- CAG TGT GGT GCA CGT CTC CAA TC -3'                | 5'- TGA ACC AAA GTT GAC CAC CAG -3'           |
| CIDEA               | 5'- TGC TCT TCT GTA TCG CCC AGT -3'                   | 5'- GCC GTG TTA AGG AAT CTG CTG -3'           |
| PRDM16              | 5'- CAG CAC GGT GAA GCC ATT C -3'                     | 5'- GCG TGC ATC CGC TTG TG -3'                |
| TFEB                | 5'- GGT GCA GTC CTA CCT GGA GA -3'                    | 5'- GTG GGC AGC AAA CTT GTT CC -3'            |
| 36B4                | 5'- ATC CCT GAC GCA CCG CCG TGA -3'                   | 5'- TGC ATC TGC TTG GAG CCC ACG TT -3'        |
| P62                 | 5'- GCT GCC CTA TAC CCA CAT CT -3'                    | 5'- GGC CTT CAT CCG AGA AAC -3'               |
| ATP6VOD2            | 5'- CAG AGC TGT ACT TCA ATG TGG AC -3'                | 5'- AGG TCT CAC ACT GCA CTA GGT -3'           |
| COX5B               | 5'- ATC GCT GAC TCT CGC CTT T -3'                     | 5'- CGT CCA TCA GCA ACA AGA GA -3'            |
| MAP1LC3B            | 5'- CGT CCT GGA CAA GAC CAA GT -3'                    | 5'- ATT GCT GTC CCG AAT GTC TC -3'            |
| BECN                | 5'- AAT CTA AGG AGT TGC CGT TAT AC -3'                | 5'- CCA GTG TCT TCA ATC TTG CC -3'            |
| LAMP1               | 5'- ACA TCA GCC CAA ATG ACA CA -3'                    | 5'- GGC TAG AGC TGG CAT TCA TC -3'            |
| CTSD                | 5'- GCT TCC GGT CTT TGA CAA CCT -3'                   | 5'- CAC CAA GCA TTA GTT CTC CTC C -3'         |
| UVRAG               | 5'- CAT CCA AAC GCA CAG AAG AA -3'                    | 5'- TTG CAC ACT GGG CTC TAT GA -3'            |
| LIPA                | 5'- CTA GAA TCT GCC AGC AAG CC -3'                    | 5'- AGT ATT CAC CGA ATC CCT CG -3'            |
| OPA1                | 5'- ATA CTG GGA TCT GCT GTT GG-3'                     | 5'- AAG TCA GGC ACA ATC CAC TT-3'             |
| DRP1                | 5'- TCA GAT CGT CGT AGT GGG AA-3'                     | 5'- TCT TCT GGT GAA ACG TGG AC-3'             |
| FIS1                | 5'- AAG TAT GTG CGA GGG CTG T-3'                      | 5'- TGC CTA CCA GTC CAT CTT TC-3'             |
| MFN1                | 5'- CCT ACT GCT CCT TCT AAC CCA-3'                    | 5'- AGG GAC GCC AAT CCT GTG A-3'              |
| MFN2                | 5'- ATG TTA CCA CGG AGC TGG AC-3'                     | 5'- AAC TGC TTC TCC GTC TGC AT-3'             |
| ADIPOQ              | 5'- CGA TTG TCA GTG GAT CTG ACG-3'                    | 5'- CAA CAG TAG CAT CCT GAG CCC T-3'          |
| FABP4               | 5'- ACA AGC TGG TGG TGG AAT GTG-3'                    | 5'- CCT TTG GCT CAT GCC CTT T-3'              |
| CEBPA               | 5'- TGC GCA AGA GCC GAG ATA AA-3'                     | 5'- CCT TCT GTT GCG TCT CCA CG-3'             |
| Genotyping Primers  |                                                       |                                               |
| Cre                 | 5'-GCA TTA CCG GTC GAT GCA ACG AGT GAT GAG-3'         | 5'-GAG TGA ACG AAC CTG GTC GAA ATC AGT GCG-3' |
| PGC-1 $\alpha$ flox | 5'-GTG GTA GAA GTA TCC AGT AGG CAG AGA TTT ATG AC -3' | 5'-GTG TCT GGT TTG ACA ATC TGC TAG GTC -3'    |
| TFEB Tg             | 5'-CAT CAA CCC TGA GAT GCA GAT GCC TAA CAC-3'         | 5'-TGT GAT TGT CTT TCT TCT GCC GCT CCT TGG-3' |
